# Supplementary material
Source: PubMed Central journal article supplement (PMC4810716)
Supplement: JVI.01829-15_zjv999091244so1.pdf [file JVI.01829-15_zjv999091244so1.pdf]

## Supplemental Figure 1. Amino acid sequence of protease region of 11 HIV<sub>MDR</sub>s

|                      | 10         | 20         | 30          | 40           | 50         | 60         | 70         | 80           | 90         | 99        |
|----------------------|------------|------------|-------------|--------------|------------|------------|------------|--------------|------------|-----------|
| HIV <sub>NL4-3</sub> | PQITLWQRPL | VTIKIGGQLK | EALLDTGADD  | TVLEEMNLPG   | RWKPKMIGGI | GGFIKVRQYD | QILIEICGHK | AIGTVLVGPT   | PVNIIGRNLL | TQIGCTLNF |
| HIV <sub>A</sub>     | .....I     | ...V.....  | .....D.E... | ....R.....   | ...V.....  | ..P.....   | V.....     | .T.....M     | ..L.F....  |           |
| HIV <sub>B</sub>     | .....I     | .....      | ..I..I....  | ....I....    | ..L.R..... | .VP.....   | V.S.....   | .A.....M     | ..L.....   |           |
| HIV <sub>C</sub>     | .....I     | ...V...R   | ..I.....    | ....I....    | ....L....  | ...V.....  | .VP.....Q  | .....A.....M | .....      |           |
| HIV <sub>G</sub>     | .....I     | IE..V...I. | .....       | ....K...L... | .....      | ..P.....   | T.....     | .A.....M     | .....      |           |
| HIV <sub>TM</sub>    | .....I     | ..R.....   | .....       | ....K...L... | ...V.....  | ..P.....   | V.....     | .A.....M     | ..L.....   |           |
| HIV <sub>MM</sub>    | .....I     | .....R..   | .....       | ..T..L....   | ...V.....  | ..P.....   | V.....     | .A.....M     | ..K.....   |           |
| HIV <sub>SS</sub>    | .....R     | .....      | .....D...   | ....T....    | .....      | .VP.....   | V.S...I... | .T.....M     | ..L.....   |           |
| HIV <sub>JSL</sub>   | .....I     | .....      | ..I.....    | ..F.DIS...   | ....L..E.  | ...V..K... | .VP.....   | V.S.....     | .A.....M   | .....     |
| HIV <sub>EV</sub>    | .....V     | .E...A..IR | .....       | ..F.DI....   | ....I..V   | ..LVR.K..E | .VP.....   | V.....       | .A.....M   | .....     |
| HIV <sub>ES</sub>    | .....I     | .....      | .....       | ....L....    | ....R....  | .VP.....   | .LC...I... | ...V...M     | .....      |           |
| HIV <sub>13-52</sub> | .....      | .....      | .....D...   | ....I....    | .....      | .VP.....   | V.....I... | .A.....M     | ..L.....   |           |

The amino acid sequences of protease deduced from nucleotide sequences of the protease-encoding region of each of the eleven HIV<sub>MDR</sub>s are shown. The consensus sequence of HIV<sub>4-3</sub> is illustrated at the top as a reference. Identity with sequence at individual amino acid positions is indicated by dots.

Table S1. X-ray diffraction data processing details for WT<sup>D25N</sup>PR in complex with GRL-0476, -015, -085, and -097.

|                                          | WT <sup>D25N</sup> PR + GRL-0476 | WT <sup>D25N</sup> PR + GRL-015 | WT <sup>D25N</sup> PR + GRL-085 | WT <sup>D25N</sup> PR + GRL-097 |
|------------------------------------------|----------------------------------|---------------------------------|---------------------------------|---------------------------------|
| PDB entry                                | 5COK                             | 5CON                            | 5COO                            | 5COP                            |
| Resolution range (Å)                     | 50.00 - 1.8                      | 50.00 - 1.75                    | 50.00 - 1.68                    | 50.00 - 2.0                     |
| Unit cell - a (Å)                        | 62.734                           | 62.786                          | 62.786                          | 62.663                          |
| b (Å)                                    | 62.734                           | 62.786                          | 62.786                          | 62.663                          |
| c (Å)                                    | 81.952                           | 81.907                          | 81.880                          | 81.955                          |
| α (°)                                    | 90                               | 90                              | 90                              | 90                              |
| β (°)                                    | 90                               | 90                              | 90                              | 90                              |
| γ (°)                                    | 120                              | 120                             | 120                             | 120                             |
| Space group                              | <i>P</i> 6 <sub>1</sub>          | <i>P</i> 6 <sub>1</sub>         | <i>P</i> 6 <sub>1</sub>         | <i>P</i> 6 <sub>1</sub>         |
| Solvent content (%)                      | 43.16                            | 43.22                           | 43.20                           | 43.06                           |
| No. of observed reflections              | 195,583                          | 211,911                         | 235,184                         | 54,416                          |
| No. of unique reflection                 | 16,990                           | 18,426                          | 11,367                          | 12,252                          |
| Mean ( <i>I</i> / $\sigma$ ( <i>I</i> )) | 59.78 <sup>a</sup> (8.95)        | 54.46 (5.9)                     | 58.14 (3.471)                   | 23.03 (2.89)                    |
| <sup>b</sup> <i>R</i> <sub>merge</sub>   | 0.079 (0.342)                    | 0.074 (0.477)                   | 0.084 (1.0)                     | 0.099 (0.526)                   |
| Data redundancy                          | 11.5 (11.3)                      | 11.5 (11.6)                     | 20.7 (20.2)                     | 4.4 (3.9)                       |
| Completeness (%)                         | 100 (100)                        | 99.4 (98.7)                     | 99.2 (84.2)                     | 98.7 (99.8)                     |

<sup>a</sup>(Values in parentheses are for the highest resolution shell);

$$\supset R_{\text{merge}} = \sum |I - \langle I \rangle| / \sum I$$

Table S2. Refinement statistics for structure solutions of WTPR<sup>D25N</sup> in complex with GRL-0476, -015, -085, and -097.

|                                                      | WTPR <sup>D25N</sup> + GRL-0476 | WTPR <sup>D25N</sup> + GRL-015 | WTPR <sup>D25N</sup> + GRL-085 | WTPR <sup>D25N</sup> + GRL-097 |
|------------------------------------------------------|---------------------------------|--------------------------------|--------------------------------|--------------------------------|
| PDB entry                                            | 5COK                            | 5CON                           | 5COO                           | 5COP                           |
| Resolution range (Å)                                 | 45.28 - 1.8                     | 31.393 - 1.8                   | 31.393 - 1.8                   | 31.332 - 2.0                   |
| No. of reflections used                              | 16,934                          | 16,922                         | 16,962                         | 12,230                         |
| <sup>a</sup> R <sub>cryst</sub>                      | 0.21                            | 0.22                           | 0.23                           | 0.20                           |
| R <sub>free</sub>                                    | 0.25                            | 0.26                           | 0.28                           | 0.26                           |
| No. of protein atoms                                 | 1514                            | 1514                           | 1514                           | 1514                           |
| No. of ligand atoms                                  | 40                              | 41                             | 43                             | 42                             |
| No. of water molecules                               | 164                             | 144                            | 132                            | 116                            |
| Mean temperature factors - protein (Å <sup>2</sup> ) | 24.567                          | 26.834                         | 26.312                         | 29.582                         |
| Main chains (Å <sup>2</sup> )                        | 22.273                          | 24.400                         | 24.050                         | 27.210                         |
| Side chains (Å <sup>2</sup> )                        | 27.078                          | 29.502                         | 28.800                         | 32.177                         |
| Ligand (Å <sup>2</sup> )                             | 21.907                          | 22.958                         | 21.798                         | 24.195                         |
| Waters (Å <sup>2</sup> )                             | 32.035                          | 33.524                         | 31.896                         | 34.336                         |
| RMSD bond lengths (Å)                                | 0.009                           | 0.008                          | 0.009                          | 0.009                          |
| RMSD bond angles (Å)                                 | 1.32                            | 1.26                           | 1.195                          | 1.190                          |
| Ramachandran plot - Most favored (%)                 | 98.45                           | 97.42                          | 96.39                          | 98.97                          |
| Additional allowed (%)                               | 1.55                            | 2.06                           | 3.09                           | 1.03                           |
| Generously allowed (%)                               | 0                               | 0.52                           | 0.52                           | 0                              |
| Disallowed (%)                                       | 0                               | 0                              | 0                              | 0                              |

$${}^a R_{\text{cryst}} = \frac{\sum ||F_{\text{obs}}| - |F_{\text{calc}}||}{\sum |F_{\text{obs}}|}$$
